# Supplementary figures and images for: The MRN complex is transcriptionally regulated by MYCN during neural cell proliferation to control replication stress
Source: PubMed Central journal article supplement — Cell Death Differ. 2015 Jun 12;23(2):197–206. doi: 10.1038/cdd.2015.81 (PMC4716299; doi:10.1038/cdd.2015.81), 2015-06-12

**A**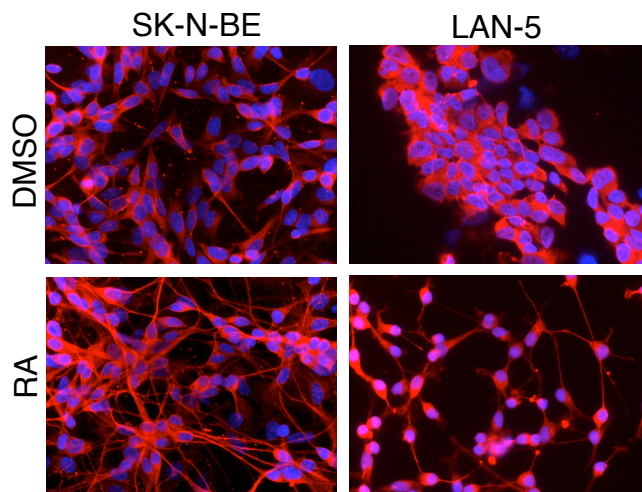**B**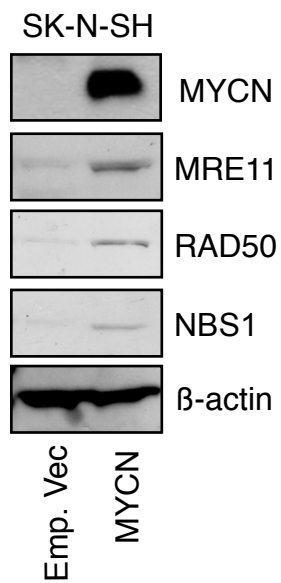**C**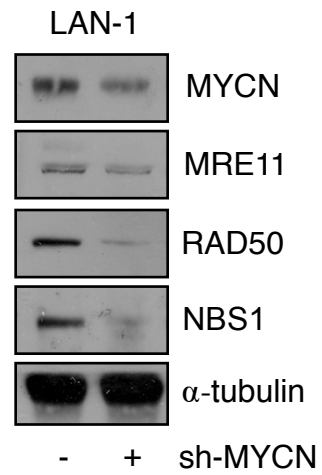

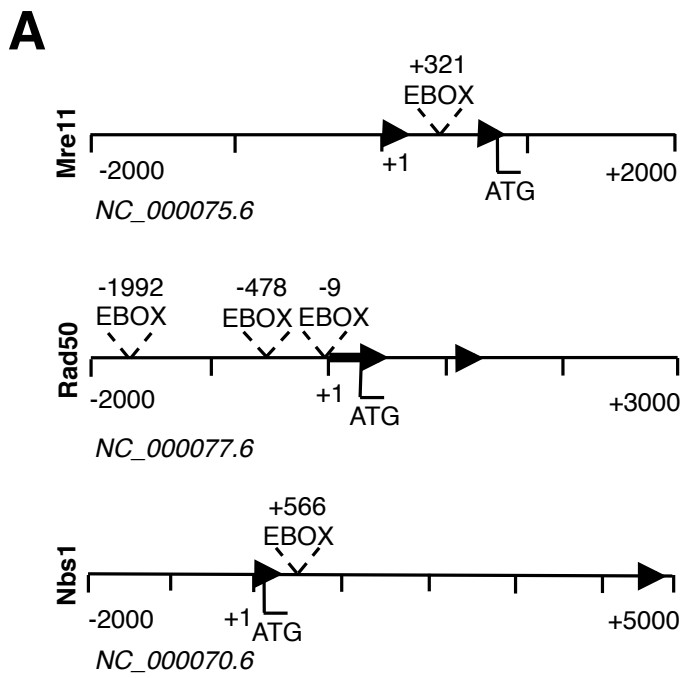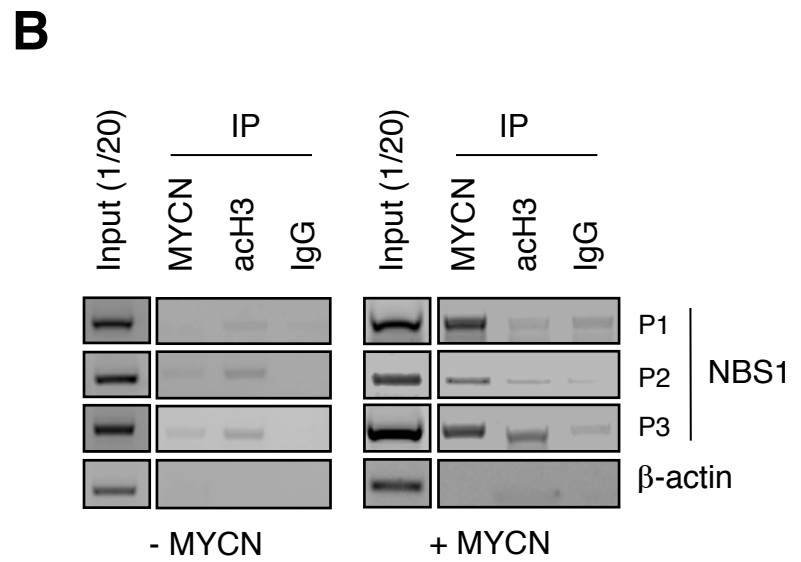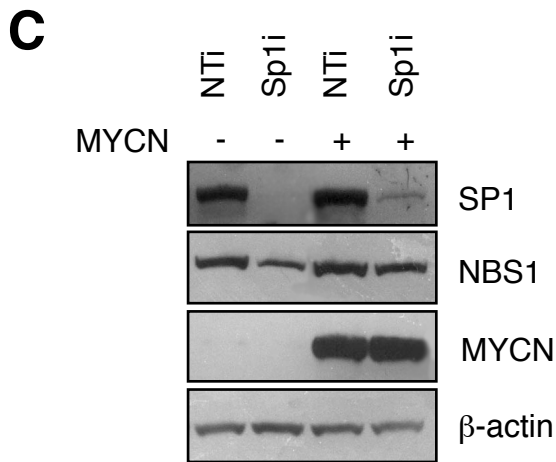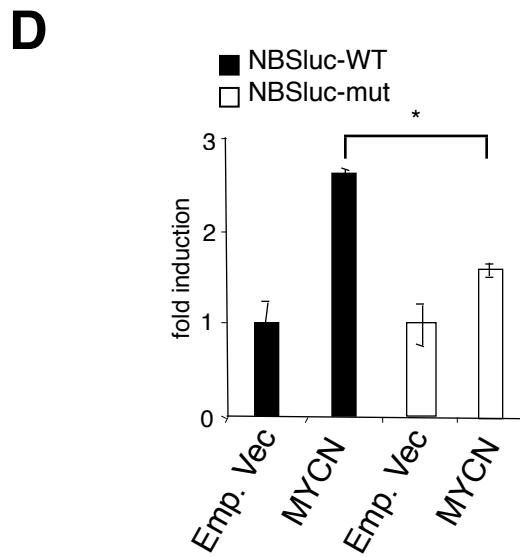

**A**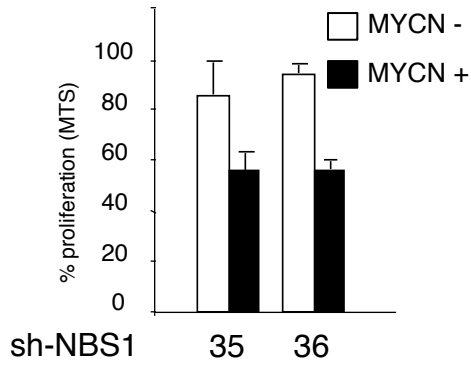**C**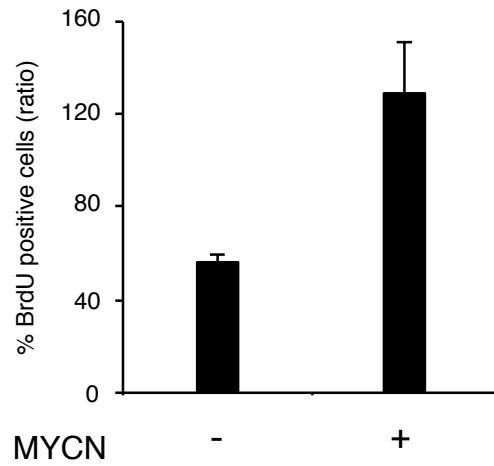**B**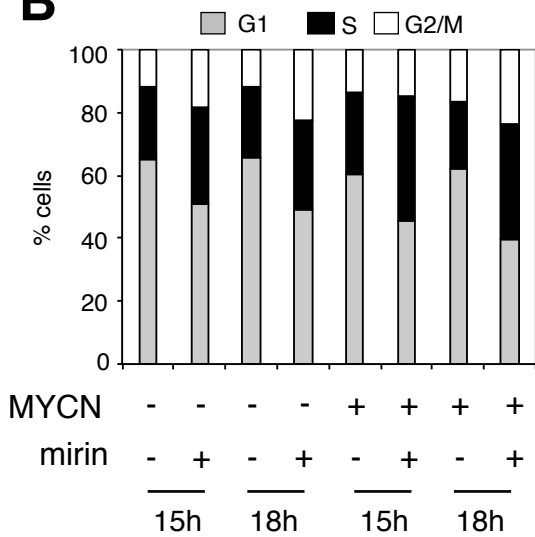**D**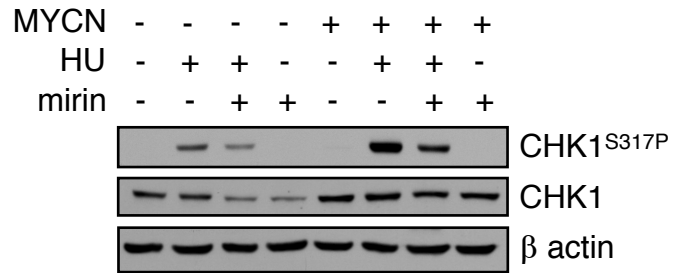**E**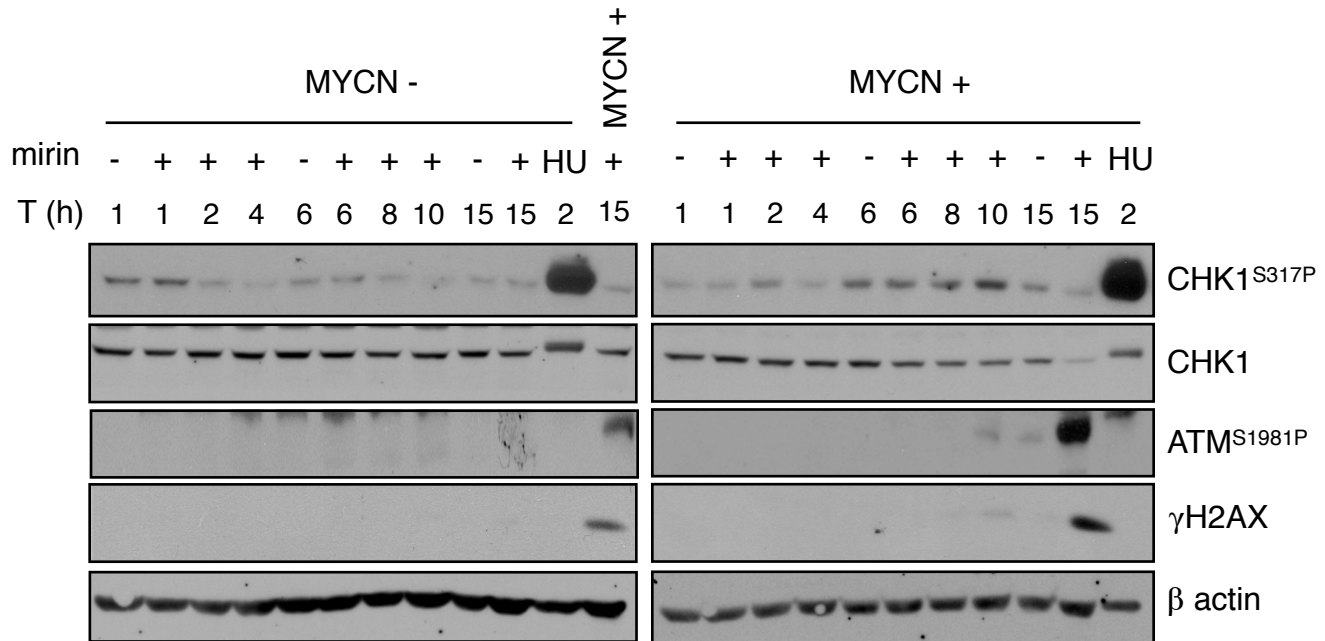

Supplement: cdd201581x1.pdf [file cdd201581x1.pdf]
